# Supplementary material for: Methods for the targeted sequencing and analysis of integrons and their gene cassettes from complex microbial communities
Source: PubMed Central journal article supplement (PMC9176274; doi:10.1099/mgen.0.000788), 2022-03-17
Supplement: mgen-8-0788-s001.pdf [file mgen-8-0788-s001.pdf]

## Supplementary Figures

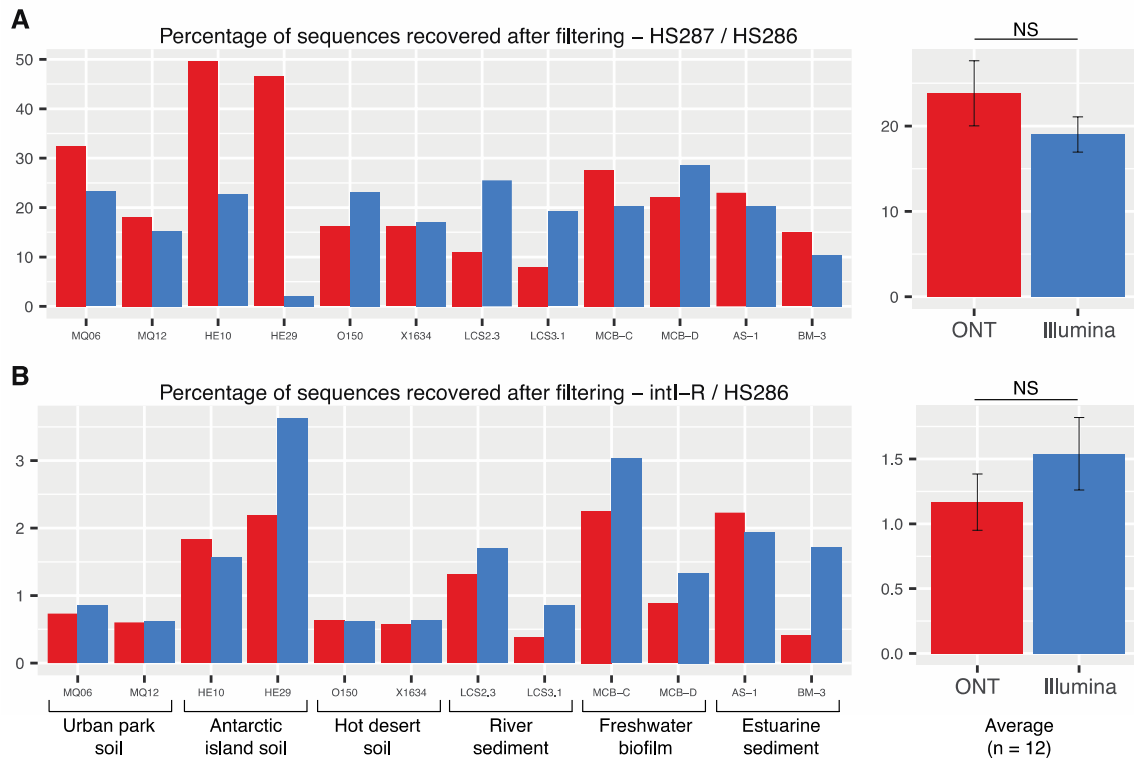

**Figure S1. Percentages of sequences recovered after bioinformatic filtering.** Filtering involved screening (A) HS287 / HS286 sequences for cassette recombination sites (*attCs*) and (B) *intI-R* / HS286 sequences for integron integrase (*IntI*) encoding genes to ensure that they represented amplicons of genuine integrons. Average ( $\pm 1$  S.E) diversity for each analysis are shown on the right-hand side of each panel. Differences between Nanopore (ONT) and Illumina MiSeq technologies were not significant (NS) as determined by two-sample T-tests.

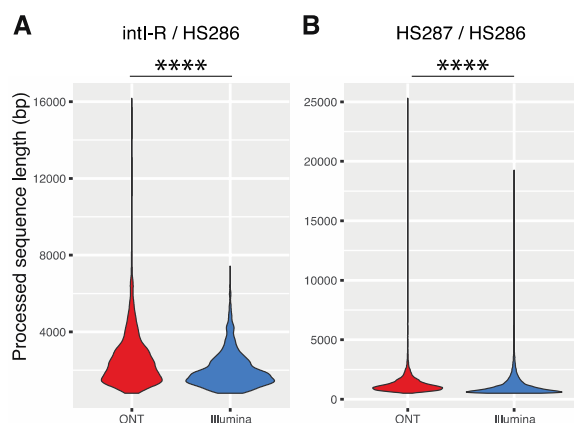

**Figure S2. Processed sequence lengths recovered by each sequencing technology.** The violin plots show the range of sequence lengths (bp) for (A) intI-R / HS286 and (B) HS287 / HS286 primer sets. The width of each curve represents the relative density of datum points across the ranges. For both primer sets, the average length of recovered amplicons (n=12) is significantly larger (Wilcoxon rank sum test,  $P < 0.0001$ ) when sequenced with Nanopore (ONT) compared to Illumina sequencing.

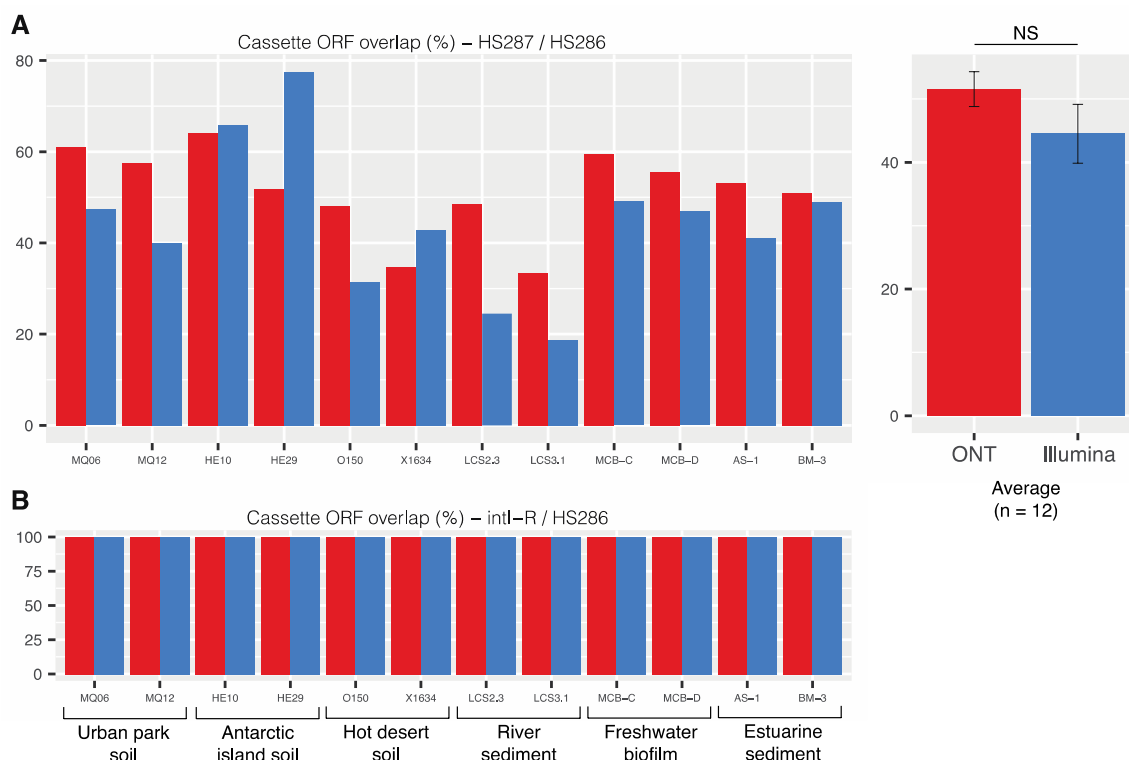

**Figure S3. Overlap in recovered ORFs between Nanopore (ONT) and Illumina sequencing technologies.** The percentage of ORFs recovered from one sequencing technology that were covered by reads from the other technology are shown for (A) HS287 / HS286 and (B) intI-R / HS286 primer sets. ORFs considered to present in the opposite sequencing technology had to have a mean coverage depth of at least 1x that spanned at least 98% of the ORF. The average ( $\pm 1$  S.E) percentage overlap for HS287 / HS286 data is shown on the right-hand side of panel (A). There was no significant (NS) difference between ONT and Illumina (Two-sample T-test,  $P = 0.209$ ).

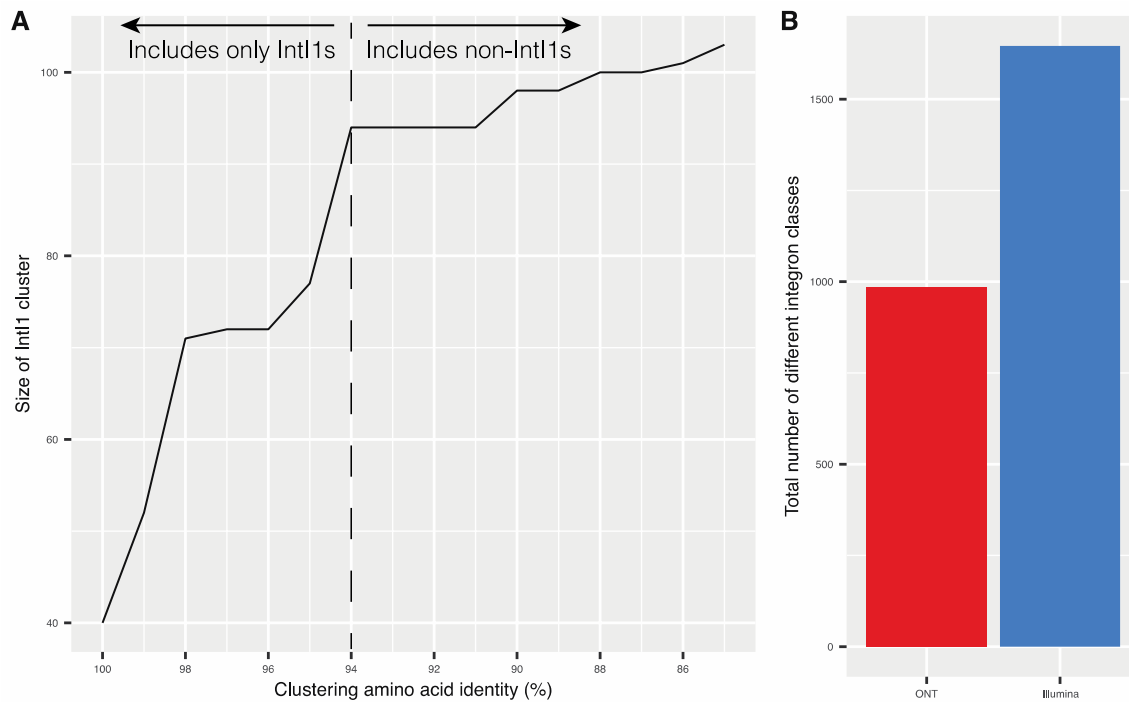

**Figure S4. Diversity of integron classes.** (A) The amino acid clustering threshold for integron classes was determined using class 1 integron integrases (IntI1) present in our dataset. Decreasing amino acid clustering thresholds were iteratively set until all IntI1s were grouped in the same cluster and all non-IntI1s were excluded. A protein sequence was considered to be IntI1 if it aligned with any previously characterised class 1 integron in GenBank using BLASTP (>98% amino acid identity and >70% subject cover). An amino acid clustering threshold of 94% was found to include all IntI1s (n=94) and exclude all non-IntI1s. (B) The total number of integron classes (based on a 94% amino acid clustering threshold) recovered for all samples (n=12).

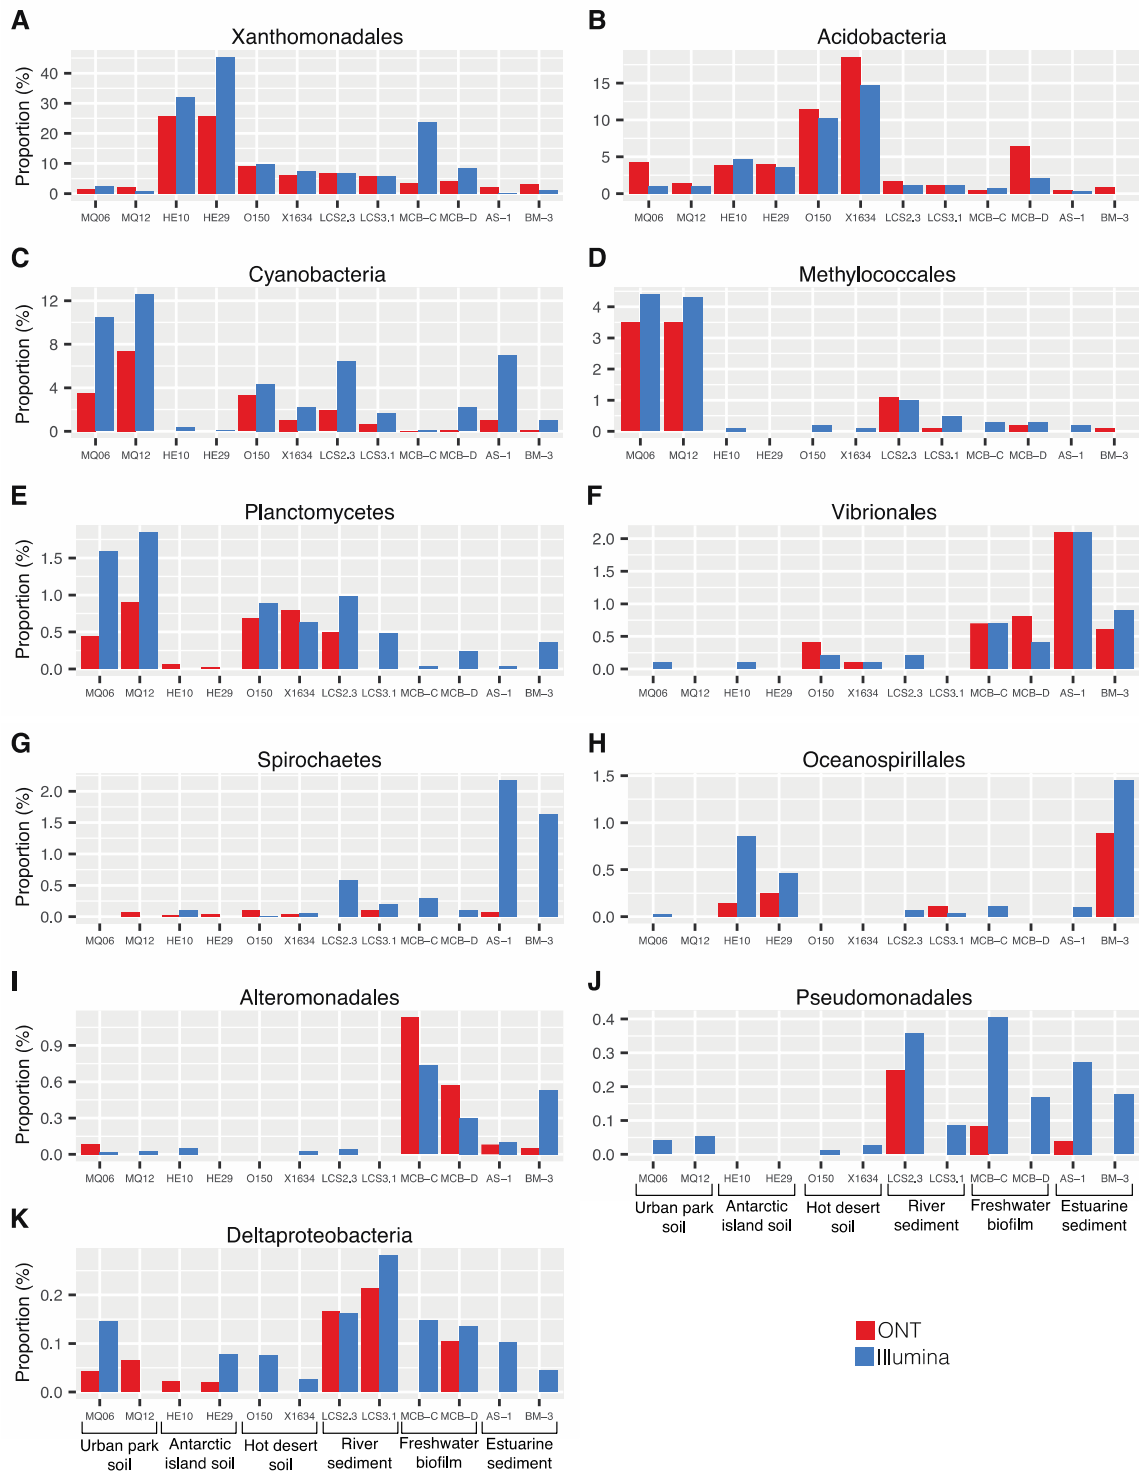

**Figure S5. Proportions of gene cassette recombination sites (*attCs*) assigned to bacterial taxa.** Taxonomic predictions are based on all eleven (A-K) available taxonomic models of chromosomal *attCs*. Each figure panel shows the proportion of *attCs* across each sample that exhibit sequence and structure conserved among that taxon.
